1 **Title:** Genetic control of variability in subcortical and intracranial volumes

2

3 **Authors:** Aldo Córdova-Palomera<sup>1,\*</sup>, Dennis van der Meer<sup>1</sup>, Tobias Kaufmann<sup>1</sup>, Francesco

4 Bettella<sup>1</sup>, Yunpeng Wang<sup>1</sup>, Dag Alnæs<sup>1</sup>, Nhat Trung Doan<sup>1</sup>, Ingrid Agartz<sup>1,2,3</sup>, Alessandro

5 Bertolino<sup>4,5</sup>, Jan K. Buitelaar<sup>6,7</sup>, David Coyne<sup>8,9</sup>, Srdjan Djurovic<sup>1</sup>, Erlend S. Dørum<sup>1,10,11</sup>,

6 Thomas Espeseth<sup>10</sup>, Leonardo Fazio<sup>5</sup>, Barbara Franke<sup>12</sup>, Oleksandr Frei<sup>1</sup>, Asta Håberg<sup>13,14</sup>,

7 Stephanie Le Hellard<sup>15</sup>, Erik G. Jönsson<sup>1,3</sup>, Knut K. Kolskår<sup>1,10,11</sup>, Martina J. Lund<sup>1</sup>, Torgeir

8 Moberget<sup>1</sup>, Jan E. Nordvik<sup>16</sup>, Lars Nyberg<sup>17</sup>, Andreas Papassotiropoulos<sup>8,18,19</sup>, Giulio Pergola<sup>5</sup>,

9 Dominique de Quervain<sup>8,9</sup>, Antonio Rampino<sup>5</sup>, Genevieve Richard<sup>1,10,11</sup>, Jaroslav Rokicki<sup>1,10</sup>,

10 Anne-Marthe Sanders<sup>1,10,11</sup>, Emanuel Schwarz<sup>20</sup>, Olav B. Smeland<sup>1</sup>, Vidar M. Steen<sup>15,21</sup>, Jostein

11 Starrfelt<sup>22</sup>, Ida E. Sønderby<sup>1</sup>, Kristine M. Ulrichsen<sup>1,10,11</sup>, Ole A. Andreassen<sup>1</sup>, Lars T.

12 Westlye<sup>1,10,\*</sup>

13

14 1 NORMENT, Division of Mental Health and Addiction, Oslo University Hospital & Institute of  
15 Clinical Medicine, University of Oslo, Norway

16 2 Department of Psychiatry, Diakonhjemmet Hospital, Oslo, Norway

17 3 Department of Clinical Neuroscience, Center for Psychiatry Research, Karolinska Institutet,  
18 Stockholm, Sweden

19 4 Institute of Psychiatry, Bari University Hospital, Bari, Italy

20 5 Department of Basic Medical Science, Neuroscience, and Sense Organs, University of Bari  
21 Aldo Moro, Bari, Italy

22 6 Department of Cognitive Neuroscience, Donders Institute for Brain, Cognition and Behaviour,  
23 Radboud University Medical Center, Nijmegen, The Netherlands

- 24 7 Karakter Child and Adolescent Psychiatry University Centre, Nijmegen, The Netherlands
- 25 8 Transfaculty Research Platform Molecular and Cognitive Neurosciences, University of Basel,  
26 Basel, Switzerland
- 27 9 Division of Cognitive Neuroscience, University of Basel, Basel, Switzerland
- 28 10 Department of Psychology, University of Oslo, Oslo, Norway
- 29 11 Sunnaas Rehabilitation Hospital HT, Nesodden, Norway
- 30 12 Departments of Human Genetics and Psychiatry, Donders Institute for Brain, Cognition and  
31 Behaviour, Radboud University Medical Center, Nijmegen, The Netherlands
- 32 13 Department of Neuromedicine and Movement Science, Norwegian University of Science and  
33 Technology, Trondheim, Norway
- 34 14 Department of Radiology and Nuclear Medicine, St. Olavs Hospital, Trondheim, Norway
- 35 15 NORMENT, Department of Clinical Science, University of Bergen, Bergen, Norway
- 36 16 CatoSenteret Rehabilitation Center, Son, Norway
- 37 17 Department of Radiation Sciences, Umeå Center for Functional Brain Imaging (UFBI), Umeå  
38 University, Umeå, Sweden
- 39 18 Division of Molecular Neuroscience, University of Basel, Basel, Switzerland
- 40 19 Life Sciences Training Facility, Department Biozentrum, University of Basel, Basel,  
41 Switzerland
- 42 20 Central Institute of Mental Health, Heidelberg University, Mannheim, Germany
- 43 21 Dr. E. Martens Research Group for Biological Psychiatry, Department of Medical Genetics,  
44 Haukeland University Hospital, Bergen, Norway
- 45 22 Centre for Ecological and Evolutionary Synthesis, Department of Biosciences, University of  
46 Oslo, Oslo, Norway

47

48

49 Correspondence: Aldo Córdova-Palomera ([aldo.cordova.palomera@gmail.com](mailto:aldo.cordova.palomera@gmail.com)) and Lars T.

50 Westlye ([l.t.westlye@psykologi.uio.no](mailto:l.t.westlye@psykologi.uio.no); [@larswestlye](https://twitter.com/larswestlye)), Department of Psychology, University of

51 Oslo, PoBox 1094 Blindern, 0317 OSLO, Norway, phone: +4722845000.

52 **Abstract**

53 Sensitivity to external demands is essential for adaptation to dynamic environments, but comes at  
54 the cost of increased risk of adverse outcomes when facing poor environmental conditions. Here,  
55 we apply a novel methodology to perform genome-wide association analysis of mean and  
56 variance in nine key brain features (accumbens, amygdala, caudate, hippocampus, pallidum,  
57 putamen, thalamus, intracranial volume and cortical thickness), integrating genetic and  
58 neuroanatomical data from a large lifespan sample (n=25,575 individuals; 8 to 89 years, mean  
59 age 51.9 years). We identify genetic loci associated with phenotypic variability in cortical  
60 thickness, thalamus, pallidum, and intracranial volumes. The variance-controlling loci included  
61 genes with a documented role in brain and mental health and were not associated with the mean  
62 anatomical volumes. This proof-of-principle of the hypothesis of a genetic regulation of brain  
63 volume variability contributes to establishing the genetic basis of phenotypic variance (i.e.,  
64 heritability), allows identifying different degrees of brain robustness across individuals, and  
65 opens new research avenues in the search for mechanisms controlling brain and mental health.

## 66 **Introduction**

67 Phenotypic variability is key in evolution, and partly reflects inter-individual differences in  
68 sensitivity to the environment <sup>1</sup>. Genetic studies of human neuroanatomy have identified shifts in  
69 mean phenotype distributions (e.g., mean brain volumes) between groups of individuals with  
70 different genotypes <sup>2</sup>, and have documented genetic overlaps with common brain and mental  
71 disorders <sup>3</sup>. Despite the evolutionary relevance of phenotypic dispersion evidenced in multiple  
72 species and traits <sup>1,4</sup>, the genetic architecture of variability in human brain morphology is  
73 elusive.

74 Phenotypic variance across genotypes can be interpreted in relation to robustness, i.e., the  
75 persistence of a system under perturbations <sup>1,4</sup> and evolvability, the capacity for adaptive  
76 evolution <sup>5</sup>. High phenotypic robustness is indicated by low variation in face of perturbations, i.e.  
77 phenotypes are strongly determined by a given genotype. In contrast, lack of robustness  
78 corresponds to high sensitivity, yielding phenotypes with overall larger deviations from the  
79 population mean in response to environmental, genetic or stochastic developmental factors.  
80 Neither increased or decreased robustness confers evolutionary advantages *per se* <sup>1</sup>, and their  
81 consequences for adaptation need to be understood in view of the genotype-environment  
82 congruence. Reduced robustness (and thus increased variability of trait expression) can be a  
83 conducive to adaptive change <sup>5</sup>, and increased variability of phenotypic expression can in itself  
84 also be favored by natural selection in fluctuating environments <sup>6</sup>. Thus, recognizing genetic  
85 markers of sensitivity can aid in identifying individuals who are more susceptible to show  
86 negative outcomes when exposed to adverse factors –either genetic or environmental– and  
87 otherwise optimal outcomes in the presence of favorable factors. Such variance-controlling

88 genotypes may be conceived as genomic hotspots for gene-environment and/or gene-gene  
89 interactions, with high relevance for future genetic epidemiology studies <sup>7</sup>.

90         To provide a proof-of-principle of the hypothesis of a genetic regulation of brain volume  
91 variability, we conducted a genome-wide association study of intragenotypic variability in seven  
92 key subcortical regions and intracranial volume (ICV) using a harmonized genotype and imaging  
93 data analysis protocol in a lifespan sample (n=25,575 individuals; 8 to 89 years, mean age 51.9  
94 years; 48% male, Methods and Supplementary Information).

## 95 **Materials and Methods**

### 96 *Participants*

97 Data from 25,575 unrelated European-ancestry individuals were included (mean age 51.9 years,  
98 ranging from 8 to 89 years old; 48% male), recruited through 16 independent cohorts with  
99 available genome-wide genotyping and T1-weighted structural MRI. Extended information on  
100 each cohort reported in Supplementary Information includes recruitment center, genotyping and  
101 brain imaging data collection, sample-specific demographics, distribution of brain volumes and,  
102 when relevant, diagnoses (795 individuals had a diagnosis). Written informed consent was  
103 provided by the participants at each recruitment center, and the protocols were approved by the  
104 corresponding Institutional Review Boards.

105

### 106 *Genotypes*

107 Only participants with European ancestry (as determined by multidimensional scaling) were  
108 included in the final set of analyses, in recognition that the inclusion of subjects from other  
109 ethnicities can potentially add genetic and phenotypic confounding. Except for the UK Biobank  
110 cohort, all directly genotyped data were imputed in-house using standard methods with the 1000  
111 Genomes European reference panel. After imputation, each genotyping batch underwent a  
112 quality control stage (MAF < 0.01; Hardy-Weinberg equilibrium  $p < 10^{-6}$ ; INFO score < 0.8).  
113 When all samples were combined, over 5 million distinct markers passed quality control  
114 genome-wide. Additional filters on genotyping frequencies were applied to the final merged  
115 dataset based on statistical considerations for genotype frequency in variance-controlling  
116 detection, as described below. Genetic data analysis was conducted using PLINK<sup>8</sup>, with R<sup>9</sup>  
117 plugin functions when appropriate (<https://www.cog-genomics.org/plink/1.9/rserve>).

118

119 *Brain features*

120 Three-dimensional T1-weighted brain scans were processed using FreeSurfer<sup>10</sup> (v5.3.0;  
121 <http://surfer.nmr.mgh.harvard.edu>). Mean cortical thickness and eight well-studied volumetric  
122 features were selected for analysis moving forward, as literature findings on large datasets show  
123 that their mean population value is influenced by common genetic variation<sup>2</sup>: accumbens,  
124 amygdala, caudate, hippocampus, pallidum, putamen, thalamus and ICV. Cohort-wise  
125 distribution of values is summarized in Supplementary Information. Before the ensuing statistical  
126 analyses, outliers (+-3 standard deviations from the mean) were removed, and generalized  
127 additive models (GAM) were implemented in R (<https://www.r-project.org>) to regress out the  
128 effects of scanning site, sex, age, diagnosis and ICV (for subcortical volumes only). Hereafter,  
129 brain volumes correspond to residuals from those GAM fits unless otherwise specified.

130

131 *Statistical analyses*

132 Genome-wide association statistics were computed for genetic effects on the mean and variance  
133 of the volumetric feature distributions. For each marker, the distribution of each outcome  
134 phenotype was normalized via rank-based inverse normal transformation (INT) to prevent  
135 statistical artifacts. Scale transformations like INT have been shown to aid genetic discovery by  
136 constraining mean-effects and reducing the effect of phenotypic outliers, which reduces Type I  
137 error rates without sacrificing power<sup>11,12</sup>. In short, INT was applied to transform each subject's  
138 phenotype ( $y_i$ ) as

$$\text{INT}(y_i) = \Phi^{-1} \left[ \frac{\text{rank}(y_i) - 0.5}{n} \right]$$



139 where  $\text{rank}(y_i)$  is the rank within the distribution,  $n$  stands for sample size (without missing  
140 values) and  $\Phi^{-1}$  denotes the standard normal quantile function. Intuitively, all phenotype values  
141 are ranked and the ranks are mapped to percentiles of a normal distribution. Then, an additive  
142 genetic model was computed with

$$\text{INT}(y) = \beta_0 + \beta_1 \text{sample} + \beta_2 C_1 + \beta_3 C_2 + \beta_4 C_3 + \beta_5 C_4 + \beta_6 \text{SNP} + \varepsilon$$

143 where  $\text{INT}(y)$  is the normalized phenotype variable; SNP is the relevant marker coded additively  
144 and  $\varepsilon$  stands for regression residuals. Four genomic principal components ( $C_1$ - $C_4$ ) were included,  
145 to control for population stratification and cryptic relatedness, and to make the results  
146 consistent/comparable with a previous large-scale analysis of genetic variation and brain  
147 volumes<sup>2</sup>. Results from that analysis (mean-model) were contrasted with the statistics from the  
148 variance-model. The previous residuals  $\varepsilon$  were again inverse normal transformed, and used as  
149 input for the variance-model using the Brown–Forsythe test. Briefly, INT-transformed residuals  
150 were used to compute  $z_{ij} = |\varepsilon_{ij} - \tilde{\varepsilon}_j|$ , with  $\tilde{\varepsilon}_j$  as the median of group  $j$  (here, genotype) and  
151 these, in turn, to compute the  $F$  statistic:

$$152 \quad F = \left( \frac{N-p}{p-1} \right) \frac{\sum_{j=1}^p n_j (\bar{z}_{.j} - \bar{z}_{..})^2}{\sum_{j=1}^p \sum_{i=1}^{n_j} (z_{ij} - \bar{z}_{.j})^2},$$

153 where  $n_j$  is the number of observations in group  $j$ ,  $p$  is the number of groups (2 or 3 different  
154 genotypes), and  $\bar{z}_{.j}$  denotes the mean in group  $j$ . To prevent increases in false positive rates  
155 arising from small groups<sup>13</sup>, only markers with at minimum (non-zero) genotype count of at  
156 least 100 were included. This value was chosen based on literature about power and statistical  
157 considerations of genome-wide association studies for phenotypic variability<sup>13</sup>. The data were  
158 analyzed and visualized in R with the aid of appropriate packages. When relevant, significant  
159 markers were annotated and additionally inspected using FUMA<sup>14</sup>.

## 160 **Results**

161 Genome-wide association statistics were computed for genetic effects on the variance and mean  
162 of the volumetric feature distributions. Consistent with previous large-scale analyses on genetics  
163 of neuroimaging volumetric measures<sup>2, 15</sup>, features included bilateral (sum of left and right)  
164 amygdala, caudate nucleus, hippocampus, nucleus accumbens, pallidum, putamen and thalamus,  
165 as well as ICV and mean cortical thickness. 96.9% of the included participants were healthy  
166 controls (n=24,780); the remaining 3.1% were diagnosed with a brain disorder (n=795; including  
167 psychosis, depression, and attention deficit hyperactivity disorder, Supplementary Information).  
168 The analyses were conducted in a two-stage protocol. For each genotype, we conducted a  
169 standard association test for the inverse-normal transformed (INT) brain volumes<sup>11</sup>, adjusting  
170 for scanning site, sex, age, age squared, diagnosis, and ICV (for the subcortical volumes only).  
171 Residuals from that model were then INT-transformed and submitted to genome-wide Levene's  
172 tests to investigate if specific alleles associate with elevated or reduced levels of phenotypic  
173 variability. For relevant markers, variances explained by mean and variance models were  
174 estimated from the INT-transformed volumes before fitting regression models using a previously  
175 reported approach<sup>7</sup>.

176 A mega-analysis of 25,575 unrelated subjects of European ancestry identified candidate  
177 loci associated with differential levels of phenotypic variability overall on four out of the nine  
178 volumetric features (pallidum, mean thickness, ICV and thalamus), including two at genome-  
179 wide significance ( $p < 5 \times 10^{-8}$ ), and two with marginal significance ( $p < 7 \times 10^{-8}$ ) (Figure 1).  
180 Genomic inflation factors ( $\lambda$ ) ranged between 1.009 and 1.049 for the nine different  
181 variance-GWAS (Supplementary Information). A conventional mean phenotype GWAS with  
182 additive model on the same set of variants, with INT-transformed phenotypes, showed 56

183 significant loci influencing four volumetric traits after adjustment for genomic inflation  
184 (accumbens [2], amygdala [4], caudate [9], hippocampus [10], pallidum [5], putamen [6],  
185 thalamus [2], ICV [10] and mean cortical thickness [8]) (Supplementary Information).  
186 Manhattan plots for both mean- and variance-GWAS are displayed as Supplementary  
187 Information.

188

189 [Insert Figure 1]

190

191 In the variance analysis, the top loci included an intergenic region on 21q21.1 around  
192 rs59515793 associated with pallidum volume variance (chr21:21977114:G:A; minor allele  
193 frequency (MAF)=0.42 ; 393518 bp from *NCAM2.6*;  $p=2.4\times 10^{-11}$ ; variance explained variance  
194 model: 0.405%; variance explained mean model: 0.0005%), and a locus in chromosome 20  
195 between *SNAP25*, *PAK7* and *ANKEF1* associated with mean cortical thickness variability  
196 (rs6039642; chr20:9940475:G:A; MAF=0.17;  $p=2.1\times 10^{-8}$ ; variance explained variance model:  
197 0.259%; variance explained mean model: 0.005%). In addition, two loci showed borderline  
198 significance associations with variance in neuroanatomical phenotypes: thalamus variability was  
199 related to genotypes on an intergenic locus near *LINC00347* (rs9543733; chr13: 75211673:C:T;  
200 MAF=0.34;  $p=6.4\times 10^{-8}$ ; variance explained mean model: 0.002%; variance explained variance  
201 model: 0.055%), whereas a region around rs10812921 on *LINGO2* was associated with ICV  
202 variability (chr9:28995582:C:A; MAF=0.4;  $p=5.5\times 10^{-8}$ ; variance explained variance model:  
203 0.07%; variance explained mean model: 0.006%). Results were consistent when re-analyzing the  
204 data from healthy controls only (excluding participants with neuropsychiatric diagnoses):  
205  $p=3.4\times 10^{-11}$  (rs59515793-pallidum),  $p=2.2\times 10^{-8}$  (rs6039642-cortical thickness),  $p=3.9\times 10^{-8}$

206 (rs9543733-thalamus) and  $p=1.4\times 10^{-7}$  (rs10812921-ICV). Figure 2 shows the relevant phenotype  
207 distributions for the top hits for the two models grouped by genotypes generated via the shift  
208 function <sup>16</sup>. In short, the adopted shift function procedure was implemented in three stages:  
209 deciles of two phenotype distributions were calculated using the Harrell-Davis quantile  
210 estimator, followed by the computation of 95% confidence intervals of decile differences with  
211 bootstrap estimation of deciles' standard error, and multiple comparison control so that the type I  
212 error rate remained close to 5% across the nine confidence intervals. Decile-by-decile shift  
213 function analysis confirmed reduce pallidum volume variance among homozygotes for the major  
214 rs59515793 allele (GG) in relation to the other two genotypes (GA, AA). Similarly, major allele  
215 homozygous subjects for rs6039642 (GG genotype) showed lower cortical thickness variance  
216 than carriers of the minor allele A. The rs10812921 heterozygotes and major allele homozygotes  
217 (AA, AC) had lower ICV variance than the participants with CC genotypes, whereas TC  
218 heterozygotes displayed higher thalamus variance than rs9543733 homozygotes (TT, CC).

219

220

[Insert Figure 2]

221

## 222 **Discussion**

223 To our knowledge, this is the first evidence of genetic loci influencing variability of brain  
224 volumes beyond their mean value. A conceptually and methodologically similar approach  
225 revealed genetic control of the variance in body height and body mass index<sup>12</sup>. Adding to the  
226 notion that phenotypic spread in a population is related to genetic variability, the current results  
227 show that the population variance of subcortical and intracranial volumes is partly under genetic  
228 control. Importantly, our findings on brain structure and the previous work on body mass index  
229<sup>12</sup> provide converging evidence supporting the notion that common genetic variants affecting the  
230 mean and the variance of a trait need not be correlated and may influence phenotypes through  
231 complementary mechanisms.

232 Most variants associated with volumetric dispersion were at loci that have previously  
233 been linked to neuropsychiatric traits. Pallidum variability was related to a genotype near the  
234 neural cell adhesion molecule 2 gene (*NCAM2*), which has a documented role in  
235 neurodevelopment and has associations with Alzheimer's disease and other neuropsychiatric  
236 phenotypes<sup>17-19</sup>. Similarly, the significant variance locus for cortical thickness on chromosome  
237 20 was located next to *PAK7* - a gene conferring risk for psychosis and involved in oxytocin  
238 gene networks of the brain<sup>20,21</sup> - and the synaptosome associated protein 25 gene (*SNAP25*) -  
239 which participates in synaptic function and increases susceptibility for severe psychiatric  
240 conditions<sup>22,23</sup>. Moreover, the locus related to ICV variance was on *LINGO2*, which has been  
241 implicated in Parkinson disease and other psychiatric conditions<sup>24-26</sup>.

242 Variance-controlling alleles can be interpreted as underlying distinct degrees of  
243 organismic robustness<sup>1</sup>. Relevance to medical genetics also comes from the observation that  
244 several disease phenotypes emerge beyond a phenotypic threshold, which could be reached by

245 the influence of high variability phenotypes<sup>27</sup>. It is thus important to understand how the  
246 identified markers relate to brain variability under changing environments (robustness), how they  
247 interact with other genetic loci (epistasis) and how they relate to the clinical manifestation of  
248 disease. Similarly, variance-controlling loci can underlie variability from other genetic factors,  
249 potentially affecting evolutionary dynamics<sup>4</sup>. Identifying the mechanisms by which variance-  
250 controlling genotypes influence gene expression variance in relevant brain structures may  
251 provide a proof of principle for the functional relevance of the identified genotypes. This type of  
252 effect on expression has been shown in model organisms<sup>28</sup>, and the genomic loci identified here  
253 represent suitable candidates for targeted gene expression analysis in the human brain. The  
254 identification of specific genes involved in neural evolution and mental disorders suggests that  
255 brain variability in human populations is mediated by genetic factors. In so doing it also  
256 underscores the validity of gene-gene and gene-environment interactions in explaining  
257 heritability of complex human traits.

258 In summary, the results indicate that beyond associations with mean volumetric values,  
259 genotypic architecture modulates the variance of subcortical and intracranial dimensions across  
260 individuals. The lack of overlap between genetic associations detected by the standard additive  
261 genetic model and variance-controlling loci indicate independent mechanisms. These findings  
262 contribute to establish the genetic basis of phenotypic variance (i.e., heritability), allow  
263 identifying different degrees of brain robustness across individuals, and open new research  
264 avenues in the search for mechanisms controlling brain and mental health.

265 **Supplemental information**

266 Supplemental information can be found with this article online.

267

268 **Author contributions**

269 Conceptualization, ACP and LTW; Methodology, ACP and LTW; Investigation, ACP, vdM, TK;

270 Writing – Original Draft, ACP and LTW; Writing – Review & Editing, all co-authors.

271

272 **Declaration of interest**

273 The authors declare no competing interests.

274

275 **Data and code availability**

276 All scripts are available upon reasonable request to the corresponding authors. Data availability

277 notes for each cohort can be found on Supplementary Information.

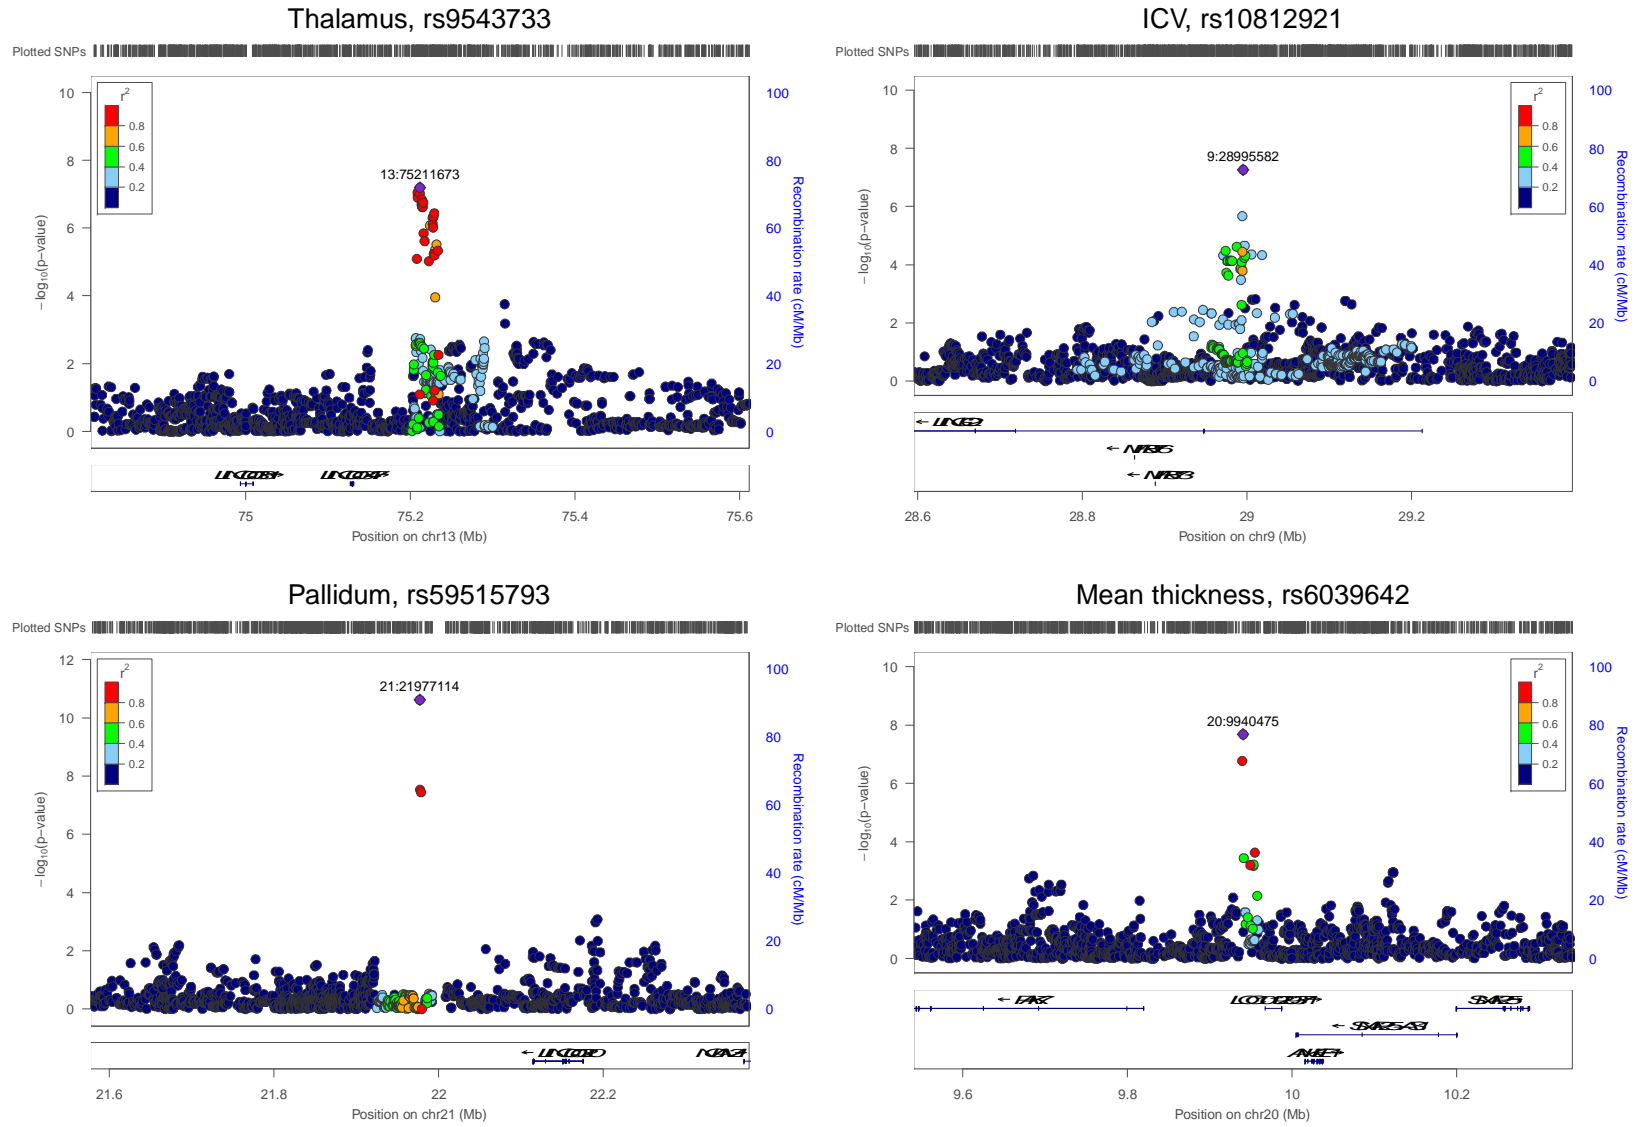

**Figure 1. Common genetic variants regulate the distribution variance of human subcortical and intracranial volumes**



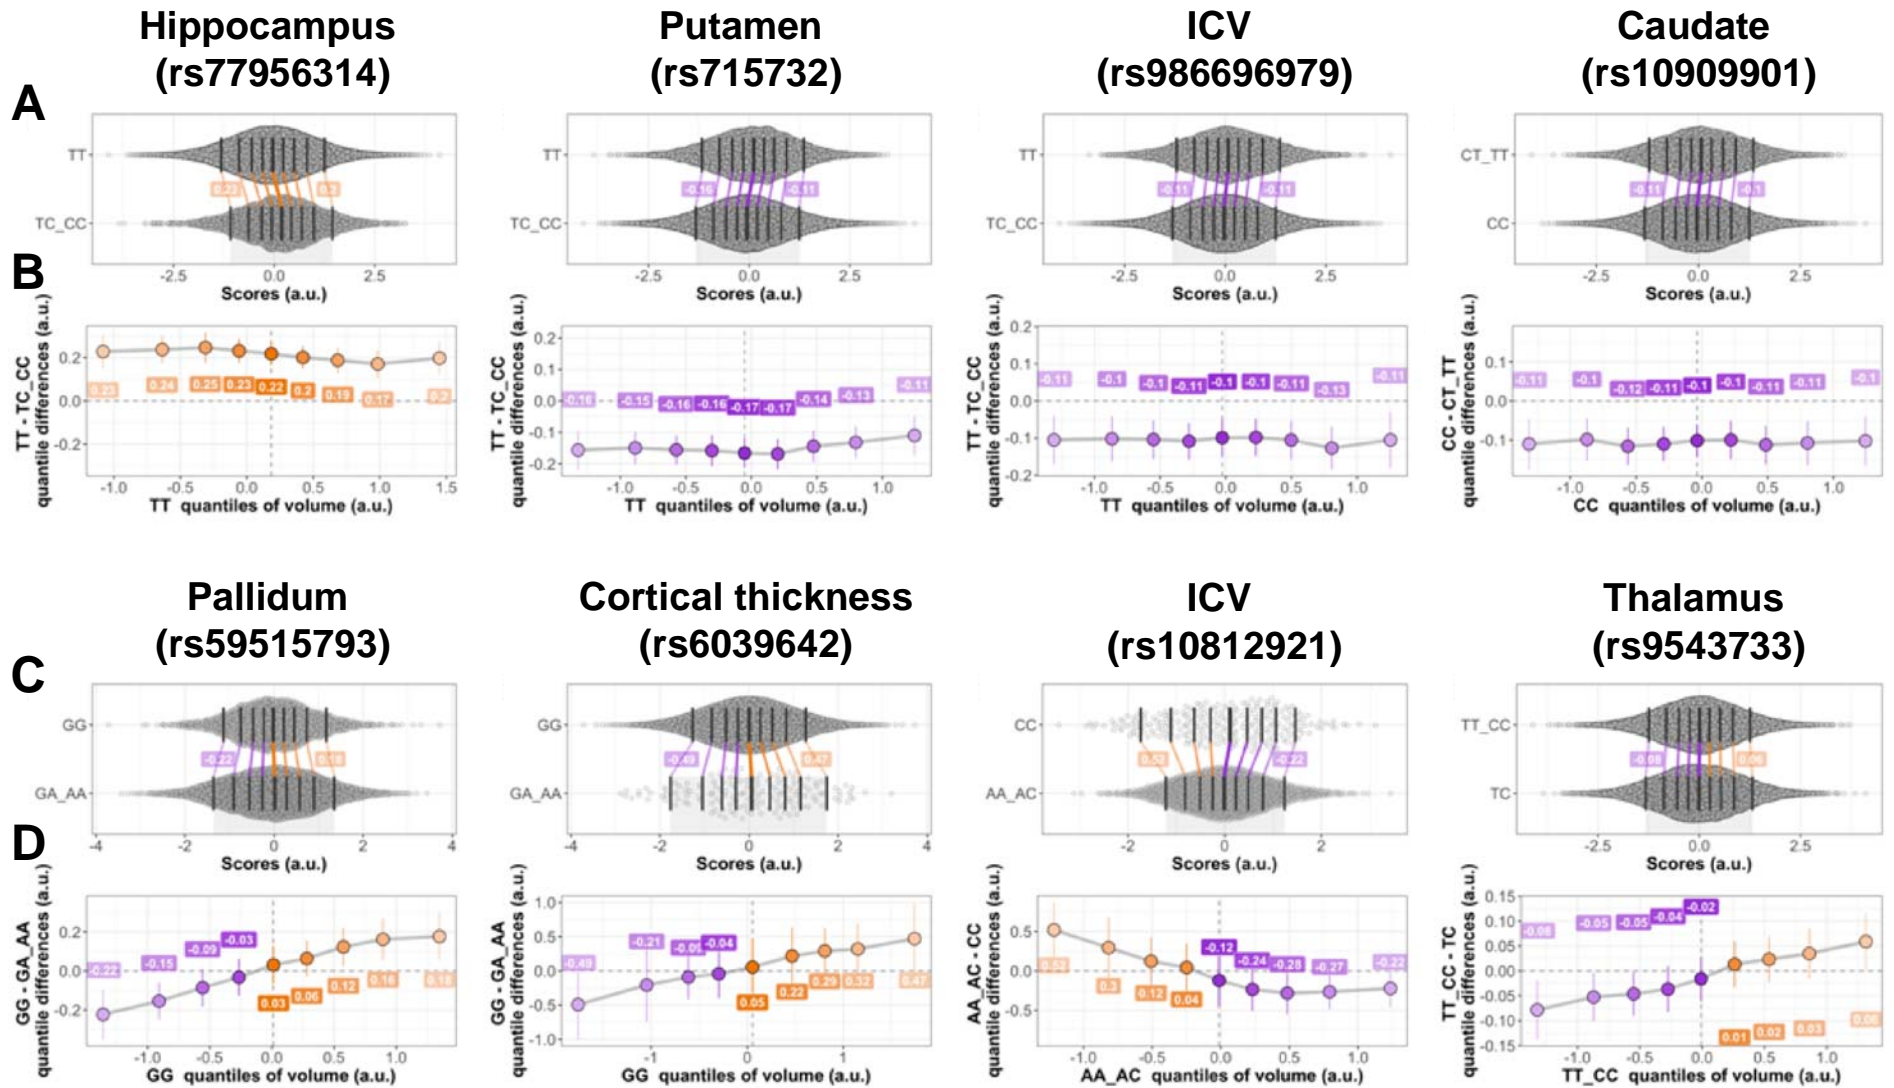

**Figure 2. Shift function plots for the top genome-wide significant associations in mean and variance model GWAS results**

The results corresponding to the top four mean models associations (conventional GWAS) are shown on the top rows (“A”, “B”), those

corresponding to the top four variance model associations are displayed on the lower sections (“C”, “D”). A: Jittered marginal distribution

scatterplots for the top four mean model associations, with overlaid shift function plots using deciles. Genotypes with the minor (effect) allele are shown as a single group. 95% confidence intervals were computed using a percentile bootstrap estimation of the standard error of the difference between quantiles on 1000 bootstrap samples. B: Linked deciles from shift functions on row “A”. C: Jittered marginal distribution scatterplots for the top four variance model associations, grouped by reference allele(s) versus effect allele(s) carriers. 95% confidence intervals were computed as in “A”. D: Linked deciles from shift functions on row “C”. For the mean model associations (“A” and “B”), variances explained by mean and variance parts of the model were 0.535% and 0.0006% (hippocampus, rs77956314), 0.444% and 0.0028% (putamen, rs715732), 0.211% and 0.0005% (ICV, rs986696979) and 0.254% and 0.0001% (caudate, rs10909901).

## References

1. Félix MA, Barkoulas M. Pervasive robustness in biological systems. *Nat Rev Genet* 2015; **16**(8): 483-496.
2. Hibar DP, Stein JL, Renteria ME, Arias-Vasquez A, Desrivieres S, Jahanshad N *et al.* Common genetic variants influence human subcortical brain structures. *Nature* 2015; **520**(7546): 224-229.
3. Smeland OB, Wang Y, Frei O, Li W, Hibar DP, Franke B *et al.* Genetic Overlap Between Schizophrenia and Volumes of Hippocampus, Putamen, and Intracranial Volume Indicates Shared Molecular Genetic Mechanisms. *Schizophr Bull* 2018; **44**(4): 854-864.
4. Wagner A. *Robustness and evolvability in living systems*. Princeton University Press: Princeton, N.J. ; Woodstock, 2005.
5. Masel J, Trotter MV. Robustness and evolvability. *Trends Genet* 2010; **26**(9): 406-414.
6. Starrfelt J, Kokko H. Bet-hedging--a triple trade-off between means, variances and correlations. *Biol Rev Camb Philos Soc* 2012; **87**(3): 742-755.
7. Shen X, Pettersson M, Rönnegård L, Carlborg Ö. Inheritance beyond plain heritability: variance-controlling genes in *Arabidopsis thaliana*. *PLoS Genet* 2012; **8**(8): e1002839.
8. Chang CC, Chow CC, Tellier LC, Vattikuti S, Purcell SM, Lee JJ. Second-generation PLINK: rising to the challenge of larger and richer datasets. *Gigascience* 2015; **4**: 7.
9. R Core Team. R: A language and environment for statistical computing. R Foundation for Statistical Computing: Vienna, Austria, 2015.
10. Fischl B, Dale AM. Measuring the thickness of the human cerebral cortex from magnetic resonance images. *Proceedings of the National Academy of Sciences of the United States of America* 2000; **97**(20): 11050-11055.
11. Auer PL, Reiner AP, Leal SM. The effect of phenotypic outliers and non-normality on rare-variant association testing. *Eur J Hum Genet* 2016; **24**(8): 1188-1194.
12. Yang J, Loos RJ, Powell JE, Medland SE, Speliotes EK, Chasman DI *et al.* FTO genotype is associated with phenotypic variability of body mass index. *Nature* 2012; **490**(7419): 267-272.
13. Shen X, Carlborg O. Beware of risk for increased false positive rates in genome-wide association studies for phenotypic variability. *Front Genet* 2013; **4**: 93.
14. Watanabe K, Taskesen E, van Bochoven A, Posthuma D. Functional mapping and annotation of genetic associations with FUMA. *Nat Commun* 2017; **8**(1): 1826.

15. Franke B, Stein JL, Ripke S, Anttila V, Hibar DP, van Hulzen KJ *et al.* Genetic influences on schizophrenia and subcortical brain volumes: large-scale proof of concept. *Nat Neurosci* 2016; **19**(3): 420-431.
16. Rousselet GA, Pernet CR, Wilcox RR. Beyond differences in means: robust graphical methods to compare two groups in neuroscience. *Eur J Neurosci* 2017; **46**(2): 1738-1748.
17. Winther M, Berezin V, Walmod PS. NCAM2/OCAM/RNCAM: cell adhesion molecule with a role in neuronal compartmentalization. *Int J Biochem Cell Biol* 2012; **44**(3): 441-446.
18. Petit F, Plessis G, Decamp M, Cuisset JM, Blyth M, Pendlebury M *et al.* 21q21 deletion involving NCAM2: report of 3 cases with neurodevelopmental disorders. *Eur J Med Genet* 2015; **58**(1): 44-46.
19. Leshchynska I, Liew HT, Shepherd C, Halliday GM, Stevens CH, Ke YD *et al.* A $\beta$ -dependent reduction of NCAM2-mediated synaptic adhesion contributes to synapse loss in Alzheimer's disease. *Nat Commun* 2015; **6**: 8836.
20. Morris DW, Pearson RD, Cormican P, Kenny EM, O'Dushlaine CT, Perreault LP *et al.* An inherited duplication at the gene p21 Protein-Activated Kinase 7 (PAK7) is a risk factor for psychosis. *Hum Mol Genet* 2014; **23**(12): 3316-3326.
21. Quintana DS, Rokicki J, van der Meer D, Alnæs D, Kaufmann T, Córdova-Palomera A *et al.* Oxytocin pathway gene networks in the human brain. *Nat Commun* 2019; **10**(1): 668.
22. Houenou J, Boisgontier J, Henrion A, d'Albis MA, Dumaine A, Linke J *et al.* A Multilevel Functional Study of a. *J Neurosci* 2017; **37**(43): 10389-10397.
23. Najera K, Fagan BM, Thompson PM. SNAP-25 in Major Psychiatric Disorders: A Review. *Neuroscience* 2019.
24. Williams SM, An JY, Edson J, Watts M, Murigneux V, Whitehouse AJO *et al.* An integrative analysis of non-coding regulatory DNA variations associated with autism spectrum disorder. *Mol Psychiatry* 2018.
25. Wu YW, Prakash KM, Rong TY, Li HH, Xiao Q, Tan LC *et al.* Lingo2 variants associated with essential tremor and Parkinson's disease. *Hum Genet* 2011; **129**(6): 611-615.
26. Vilariño-Güell C, Wider C, Ross OA, Jasinska-Myga B, Kachergus J, Cobb SA *et al.* LINGO1 and LINGO2 variants are associated with essential tremor and Parkinson disease. *Neurogenetics* 2010; **11**(4): 401-408.

27. Ayroles JF, Buchanan SM, O'Leary C, Skutt-Kakaria K, Grenier JK, Clark AG *et al.* Behavioral idiosyncrasy reveals genetic control of phenotypic variability. *Proc Natl Acad Sci U S A* 2015; **112**(21): 6706-6711.
28. Huang W, Carbone MA, Magwire MM, Peiffer JA, Lyman RF, Stone EA *et al.* Genetic basis of transcriptome diversity in *Drosophila melanogaster*. *Proc Natl Acad Sci U S A* 2015; **112**(44): E6010-6019.
