**Title:** Genetic control of variability in subcortical and intracranial volumes

**Authors:** Aldo Córdova-Palomera<sup>1,a,\*</sup>, Dennis van der Meer<sup>1</sup>, Tobias Kaufmann<sup>1</sup>, Francesco Bettella<sup>1</sup>, Yunpeng Wang<sup>1</sup>, Dag Alnæs<sup>1</sup>, Nhat Trung Doan<sup>1</sup>, Ingrid Agartz<sup>1,2,3</sup>, Alessandro Bertolino<sup>4,5</sup>, Jan K. Buitelaar<sup>6,7</sup>, David Coyne<sup>8,9</sup>, Srdjan Djurovic<sup>1</sup>, Erlend S. Dørum<sup>1,10,11</sup>, Thomas Espeseth<sup>1,10</sup>, Leonardo Fazio<sup>5</sup>, Barbara Franke<sup>12</sup>, Oleksandr Frei<sup>1</sup>, Asta Håberg<sup>13,14</sup>, Stephanie Le Hellard<sup>15</sup>, Erik G. Jönsson<sup>1,3</sup>, Knut K. Kolskår<sup>1,10,11</sup>, Martina J. Lund<sup>1</sup>, Torgeir Moberget<sup>1</sup>, Jan E. Nordvik<sup>11</sup>, Lars Nyberg<sup>16</sup>, Andreas Papassotiropoulos<sup>8,17,18</sup>, Giulio Pergola<sup>5</sup>, Dominique de Quervain<sup>8,9</sup>, Antonio Rampino<sup>5</sup>, Genevieve Richard<sup>1,10,11</sup>, Jaroslav Rokicki<sup>1,10</sup>, Anne-Marthe Sanders<sup>1,10,11</sup>, Emanuel Schwarz<sup>19</sup>, Olav B. Smeland<sup>1</sup>, Vidar M. Steen<sup>15,20</sup>, Jostein Starrfelt<sup>21</sup>, Ida E. Sørnderby<sup>1</sup>, Kristine M. Ulrichsen<sup>1,10,11</sup>, Ole A. Andreassen<sup>1</sup>, Lars T. Westlye<sup>1,10,\*</sup>

[Author byline]: for the Alzheimer's Disease Neuroimaging Initiative<sup>22</sup>, for the Pediatric Imaging, Neurocognition and Genetics Study<sup>23</sup>

1 NORMENT, KG Jebsen Centre for Psychosis Research, Division of Mental Health and Addiction, Oslo University Hospital & Institute of Clinical Medicine, University of Oslo, Norway

2 Department of Psychiatry, Diakonhjemmet Hospital, Oslo, Norway

3 Department of Clinical Neuroscience, Center for Psychiatry Research, Karolinska Institutet, Stockholm, Sweden

4 Institute of Psychiatry, Bari University Hospital, Bari, Italy

5 Department of Basic Medical Science, Neuroscience, and Sense Organs, University of Bari

Aldo Moro, Bari, Italy

6 Department of Cognitive Neuroscience, Donders Institute for Brain, Cognition and Behaviour,

Radboud University Medical Center, Nijmegen, The Netherlands

7 Karakter Child and Adolescent Psychiatry University Centre, Nijmegen, The Netherlands

8 Transfaculty Research Platform Molecular and Cognitive Neurosciences, University of Basel,

Basel, Switzerland

9 Division of Cognitive Neuroscience, University of Basel, Basel, Switzerland

10 Department of Psychology, University of Oslo, Oslo, Norway

11 Sunnaas Rehabilitation Hospital HT, Nesodden, Norway

12 Departments of Human Genetics and Psychiatry, Donders Institute for Brain, Cognition and

Behaviour, Radboud University Medical Center, Nijmegen, The Netherlands

13 Department of Neuromedicine and Movement Science, Norwegian University of Science and

Technology, Trondheim, Norway

14 Department of Radiology and Nuclear Medicine, St. Olavs Hospital, Trondheim, Norway

15 NORMENT, K.G. Jebsen Center for Psychosis Research, Department of Clinical Science,

University of Bergen, Bergen, Norway

16 Department of Radiation Sciences, Umeå Center for Functional Brain Imaging (UFBI), Umeå

University, Umeå, Sweden

17 Division of Molecular Neuroscience, University of Basel, Basel, Switzerland

18 Life Sciences Training Facility, Department Biozentrum, University of Basel, Basel,

Switzerland

19 Central Institute of Mental Health, Heidelberg University, Mannheim, Germany

20 Dr. E. Martens Research Group for Biological Psychiatry, Department of Medical Genetics, Haukeland University Hospital, Bergen, Norway

21 Centre for Ecological and Evolutionary Synthesis, Department of Biosciences, University of Oslo, Oslo, Norway

22 Data used in preparation of this article were obtained from the Alzheimer's Disease Neuroimaging Initiative (ADNI) database ([adni.loni.usc.edu](http://adni.loni.usc.edu)). As such, the investigators within the ADNI contributed to the design and implementation of ADNI and/or provided data but did not participate in analysis or writing of this report. A complete listing of ADNI investigators can be found at: [http://adni.loni.usc.edu/wp-content/uploads/how\\_to\\_apply/ADNI\\_Acknowledgement\\_List.pdf](http://adni.loni.usc.edu/wp-content/uploads/how_to_apply/ADNI_Acknowledgement_List.pdf).

23 Data used in preparation of this article were obtained from the Pediatric Imaging, Neurocognition and Genetics Study (PING) database (<http://ping.chd.ucsd.edu>). As such, the investigators within PING contributed to the design and implementation of PING and/or provided data but did not participate in analysis or writing of this report. A complete listing of PING investigators can be found at <https://ping-dataportal.ucsd.edu/sharing/Authors10222012.pdf>

<sup>a</sup> Present address: Department of Pediatrics, Stanford University School of Medicine, Stanford, USA

Correspondence: Aldo Córdova-Palomera ([aldoc@medisin.uio.no](mailto:aldoc@medisin.uio.no)) and Lars T. Westlye ([l.t.westlye@psykologi.uio.no](mailto:l.t.westlye@psykologi.uio.no)).

## **Abstract**

Sensitivity to external demands is essential for adaptation to dynamic environments, but comes at the cost of increased risk of adverse outcomes when facing poor environmental conditions. Here we identify genetic loci associated with phenotypic variability in key brain structures: amygdala, pallidum, and intracranial volumes. Variance-controlling loci included genes with a documented role in brain and mental health and were not associated with the mean anatomical volumes.

## Main

Phenotypic variability is key in evolution, and partly reflects inter-individual differences in sensitivity to the environment<sup>1</sup>. Genetic studies of human neuroanatomy have identified shifts in mean phenotype distributions (e.g., mean brain volumes) between groups of individuals with different genotypes<sup>2</sup>, and have documented genetic overlaps with common brain and mental disorders<sup>3</sup>. Despite the evolutionary relevance of phenotypic dispersion evidenced in multiple species and traits<sup>1,4</sup>, the genetic architecture of variability in human brain morphology is elusive.

Phenotypic variance across genotypes can be interpreted in relation to robustness, i.e., the persistence of a system under perturbations<sup>1,4</sup> and evolvability, the capacity for adaptive evolution<sup>5</sup>. High phenotypic robustness is indicated by low variation in face of perturbations, i.e. phenotypes are strongly determined by a given genotype. In contrast, lack of robustness corresponds to high sensitivity, yielding phenotypes with overall larger deviations from the population mean in response to environmental, genetic or stochastic developmental factors. Neither increased or decreased robustness confers evolutionary advantages *per se*<sup>1</sup>, and their consequences for adaptation need to be understood in view of the genotype-environment congruence. Reduced robustness (and thus increased variability of trait expression) can be a conducive to adaptive change<sup>5</sup>, and increased variability of phenotypic expression can in itself also be favored by natural selection in fluctuating environments<sup>6</sup>. Thus, recognizing genetic markers of sensitivity can aid in identifying individuals who are more susceptible to show negative outcomes when exposed to adverse factors –either genetic or environmental– and otherwise optimal outcomes in the presence of favorable factors. Such variance-controlling genotypes may be conceived as genomic hotspots for gene-environment and/or gene-gene interactions, with high relevance for future genetic epidemiology studies<sup>7</sup>.

To provide a proof-of-principle of the hypothesis of a genetic regulation of brain volume variability, we conducted a genome-wide association study of intragenotypic variability in seven key subcortical regions and intracranial volume (ICV) using a harmonized genotype and imaging data analysis protocol in a lifespan sample (n=19,093 individuals; 3 to 91 years, mean age 47.8 years; 48% male, Methods and Supplementary Information). Genome-wide association statistics were computed for genetic effects on the variance and mean of the volumetric feature distributions. Consistent with previous large-scale analyses on genetics of neuroimaging volumetric measures<sup>2,8</sup>, features included bilateral (sum of left and right) amygdala, caudate nucleus, hippocampus, nucleus accumbens, pallidum, putamen and thalamus, as well as ICV. Over 92% of the included participants were healthy controls (n=17,590); the remaining 8% were diagnosed with a brain disorder (n=1,503; including psychosis, depression, and neurodegenerative disorders, Supplementary Information). The analyses were conducted in a two-stage protocol. For each genotype, we conducted a standard association test for the inverse-normal transformed (INT) brain volumes<sup>9</sup>, adjusting for scanning site, sex, age, age squared, diagnosis, and ICV (for the subcortical volumes only). The residuals from that model were then INT-transformed and submitted to genome-wide Levene's tests to investigate if specific alleles associate with elevated or reduced levels of phenotypic variability. For relevant markers, variances explained by mean and variance models were estimated from the INT-transformed volumes before fitting regression models using a previously reported approach<sup>7</sup>.

A mega-analysis of 19,093 unrelated subjects of European ancestry identified two loci associated with differential levels of phenotypic variability at genome-wide significance ( $p < 5 \times 10^{-8}$ ), and one with marginal significance ( $p = 5.7 \times 10^{-8}$ ) overall on three out of the eight volumetric features (pallidum, ICV, and amygdala). Genomic inflation factors (lambda) ranged

between 1.005 and 1.102 for the different variance-GWAS (Supplementary Information) and were adjusted using genomic control (based on the observation that here the  $F$ -statistic of the Brown-Forsythe test can be approximated by a chi-squared statistic<sup>7</sup>). A conventional mean phenotype GWAS with additive model on INT-transformed phenotypes showed 14 significant loci influencing four volumetric traits (amygdala [2], caudate [2], hippocampus [4], pallidum [2], putamen [3] and ICV [1]), and two loci (from amygdala and ICV analyses) were close to significant ( $p < 10^{-7}$ ). Manhattan plots for both mean- and variance-GWAS are displayed as Supplementary Information.

[Insert Figure 1]

Genome-wide significant loci included an intergenic locus around rs741078 associated with pallidum volume variance (chr4:10215987:A:G; minor allele frequency (MAF)=0.113; 13691 bp from *AC006499.6*;  $p=2.1 \times 10^{-8}$ ; variance explained variance model: 0.67%; variance explained mean model: 0.01%), and a locus in a *TMPRSS15* intron associated with ICV variance (rs4482570; chr21:19762408:C:T; MAF=0.325;  $p=5.1 \times 10^{-9}$ ; variance explained variance model: 0.19%; variance explained mean model: 0.01%). In addition, a variance-controlling locus for amygdala volume in an intron of *SATB2* showed borderline significance (rs10497831; chr2:200142649:A:G; MAF=0.152;  $p=5.7 \times 10^{-8}$ ; variance explained mean model: 0.001%; variance explained variance model: 0.09%). Results were consistent when re-analyzing the data from healthy controls only (excluding participants with neuropsychiatric diagnoses):  $p=8.6 \times 10^{-9}$  (rs741078-pallidum),  $p=6.5 \times 10^{-9}$  (rs4482570-ICV) and  $p=2.5 \times 10^{-7}$  (rs10497831-amygdala). Figure 2 shows the relevant phenotype distributions for the top hits for the two models grouped

by genotypes generated via the shift function<sup>10</sup>. In short, the adopted shift function procedure was implemented in three stages: deciles of two phenotype distributions were estimated using the Harrell-Davis quantile estimator, followed by the computation of 95% confidence intervals of decile differences with bootstrap estimation of deciles' standard error, and multiple comparison control so that the type I error rate remained close to 5% across the nine confidence intervals. Decile-by-decile shift function analysis confirmed higher amygdala volume variance among homozygotes for the minor rs10497831 allele (GG) in relation to the other two genotypes (AA, AG). Similarly, minor allele homozygous subjects for rs741078 (CC genotype) showed higher pallidum volume variance than carriers of the major allele A. The rs4482570 heterozygotes and minor allele homozygotes (CT, TT) had higher ICV variance than the participants with CC genotypes. Pathway analysis on pallidum, ICV and amygdala variance-controlling summary statistics using MAGMA Gene-Set Analysis on the summary statistics (via FUMA<sup>11</sup>) revealed significant enrichment for the term "neuron projection regeneration" (pallidum GWAS: 28 genes,  $\beta=0.6$ , standard error: 0.135,  $p=4\times 10^{-6}$ , Bonferroni  $p=0.046$ ) (more detailed results provided as Supplementary Information). No significant enrichment was found for ICV or amygdala.

[Insert Figure 2]

To our knowledge, this is the first evidence of genetic loci influencing variability of brain volumes beyond their mean value. A conceptually and methodologically similar approach revealed genetic control of the variance in body height and body mass index<sup>12</sup>. Adding to the notion that phenotypic spread in a population is related to genetic variability, our current findings



show that the population variance of subcortical and intracranial volumes is partly under genetic control. Importantly, our findings on brain structure and the previous work on body mass index<sup>12</sup> provide converging evidence supporting the notion that common genetic variants affecting the mean and the variance of a trait need not be correlated and may influence phenotypes through complementary mechanisms.

Variants associated with volumetric dispersion mapped to genes that have previously been linked to cognitive and mental health traits. Amygdala variability was related to a genotype in *SATB2*, which has been associated with intelligence<sup>13</sup>, and is expressed in adult and fetal brain, and related to syndromic neurodevelopmental deficits<sup>14</sup>. Similarly, the significant variance locus (21q21.1) for ICV spanned *TMPRSS15*, a gene reportedly linked to neurodevelopmental disruptions<sup>15</sup> and to brain changes in post-traumatic stress disorder<sup>16</sup>. Moreover, pathway analysis with MAGMA Gene-Set Analysis using the full set of variance-controlling GWAS results from the pallidum analysis revealed significant enrichment for the “neuron projection regeneration” term, providing a plausible mechanism modulating neuroanatomical adaptation in response to distinct genetic and environmental factors.

Variance-controlling alleles can be interpreted as underlying distinct degrees of organismic robustness<sup>1</sup>. Relevance to medical genetics also comes from the observation that several disease phenotypes emerge beyond a phenotypic threshold, which could be reached by the influence of high variability phenotypes<sup>17</sup>. It is thus important to understand how the identified markers relate to brain variability under changing environments (robustness), how they interact with other genetic loci (epistasis) and how they relate to the clinical manifestation of disease. Similarly, variance-controlling loci can underlie variability from other genetic factors, potentially affecting evolutionary dynamics<sup>4</sup>. Identifying the mechanisms by which variance-

controlling genotypes influence gene expression variance in relevant brain structures may provide a proof of principle for the functional relevance of the identified genotypes. This type of effect on expression has been shown in model organisms<sup>18</sup>, and the genomic loci identified here represent suitable candidates for targeted gene expression analysis in the human brain. The identification of specific genes involved in neural evolution and mental disorders suggests that brain variability in human populations is mediated by genetic factors. In so doing it also underscores the validity of gene-gene and gene-environment interactions in explaining heritability of complex human traits.

In summary, the results indicate that beyond associations with mean volumetric values, genotypic architecture modulates the variance of subcortical and intracranial dimensions across individuals. The lack of overlap between genetic associations detected by the standard additive genetic model and variance-controlling loci indicate independent mechanisms. These findings contribute to establish the genetic basis of phenotypic variance (i.e., heritability), allow identifying different degrees of brain robustness across individuals, and open new research avenues in the search for mechanisms controlling brain and mental health.

## Methods

### *Participants*

Data from 19,093 unrelated European-ancestry individuals were included (mean age 47.8 years, ranging from 3.2 to 91.4 years old; 48% male), recruited through 16 independent cohorts with available genome-wide genotyping and T1-weighted structural MRI. Extended information on each cohort reported in Supplementary Information includes recruitment center, genotyping and brain imaging data collection, sample-specific demographics, distribution of brain volumes and, when relevant, diagnoses (1,464 individuals had a diagnosis). Written informed consent was provided by the participants at each recruitment center, and the protocols were approved by the corresponding Institutional Review Boards.

### *Genotypes*

Only participants with European ancestry (as determined by multidimensional scaling) were included in the final set of analyses, in recognition that the inclusion of subjects from other ethnicities can potentially add genetic and phenotypic confounding. Except for the UK Biobank cohort, all directly genotyped data were imputed in-house using standard methods with the 1000 Genomes European reference panel. After imputation, each genotyping batch underwent a quality control stage (MAF < 0.01; Hardy-Weinberg equilibrium  $p < 10^{-6}$ ; INFO score < 0.8). When all samples were combined, over 5 million distinct markers passed quality control genome-wide. Additional filters on genotyping frequencies were applied to the final merged dataset based on statistical considerations for genotype frequency in variance-controlling detection, as described below.

### *Brain features*

Three-dimensional T1-weighted brain scans were processed using FreeSurfer<sup>19</sup> (v5.3.0; <http://surfer.nmr.mgh.harvard.edu/>). Eight well-studied volumetric features were selected for analysis moving forward, as literature findings on large datasets show that their mean population value is influenced by common genetic variation<sup>2</sup>: accumbens, amygdala, caudate, hippocampus, pallidum, putamen, thalamus and ICV. Cohort-wise distribution of values is summarized in Supplementary Information. Before the ensuing statistical analyses, outliers (+3 standard deviations from the mean) were removed, and generalized additive models (GAM) were implemented in R (<https://www.r-project.org>) to regress out the effects of scanning site, sex, age, diagnosis and ICV (for subcortical volumes only). Hereafter, brain volumes correspond to residuals from those GAM fits unless otherwise specified.

### *Statistical analyses*

Genome-wide association statistics were computed for genetic effects on the mean and variance of the volumetric feature distributions. For each marker, the distribution of each outcome phenotype was normalized via rank-based inverse normal transformation (INT) to prevent statistical artifacts. Scale transformations like INT have been shown to aid genetic discovery by constraining mean-effects and reducing the effect of phenotypic outliers, which reduces Type I error rates without sacrificing power<sup>9,12</sup>. In short, INT was applied to transform each subject's phenotype ( $y_i$ ) as

$$\text{INT}(y_i) = \Phi^{-1} \left[ \frac{\text{rank}(y_i) - 0.5}{n} \right]$$

where  $\text{rank}(y_i)$  is the rank within the distribution,  $n$  stands for sample size (without missing values) and  $\Phi^{-1}$  denotes the standard normal quantile function. Intuitively, all phenotype values

are ranked and the ranks are mapped to percentiles of a normal distribution. Then, an additive genetic model was computed with

$$\text{INT}(y) = \beta_0 + \beta_1 \text{sample} + \beta_2 C_1 + \beta_3 C_2 + \beta_4 C_3 + \beta_5 C_4 + \beta_6 \text{SNP} + \varepsilon$$

where  $\text{INT}(y)$  is the normalized phenotype variable; SNP is the relevant marker coded additively and  $\varepsilon$  stands for regression residuals. Four genomic principal components ( $C_1$ - $C_4$ ) were included, to control for population stratification and cryptic relatedness, and to make the results consistent/comparable with a previous large-scale analysis of genetic variation and brain volumes<sup>2</sup>. Results from that analysis (mean-model) were contrasted with the statistics from the variance-model. The previous residuals  $\varepsilon$  were again inverse normal transformed, and used as input for the variance-model using the Brown–Forsythe test. Briefly, INT-transformed residuals were used to compute  $z_{ij} = |\varepsilon_{ij} - \tilde{\varepsilon}_j|$ , with  $\tilde{\varepsilon}_j$  as the median of group  $j$  (here, genotype) and these, in turn, to compute the  $F$  statistic:

$$F = \left( \frac{N-p}{p-1} \right) \frac{\sum_{j=1}^p n_j (\bar{z}_{.j} - \bar{z}_{..})^2}{\sum_{j=1}^p \sum_{i=1}^{n_j} (\bar{z}_{ij} - \bar{z}_{.j})^2},$$

where  $n_j$  is the number of observations in group  $j$ ,  $p$  is the number of groups (2 or 3 different genotypes), and  $\bar{z}_{.j}$  denotes the mean in group  $j$ . To prevent increases in false positive rates arising from small groups<sup>20</sup>, only markers with at minimum (non-zero) genotype count of at least 100 were included. This value was chosen based on literature about power and statistical considerations of genome-wide association studies for phenotypic variability<sup>20</sup>. The data were analyzed and visualized in R with the aid of appropriate packages. When relevant, significant markers were annotated and additionally inspected using FUMA<sup>11</sup>.

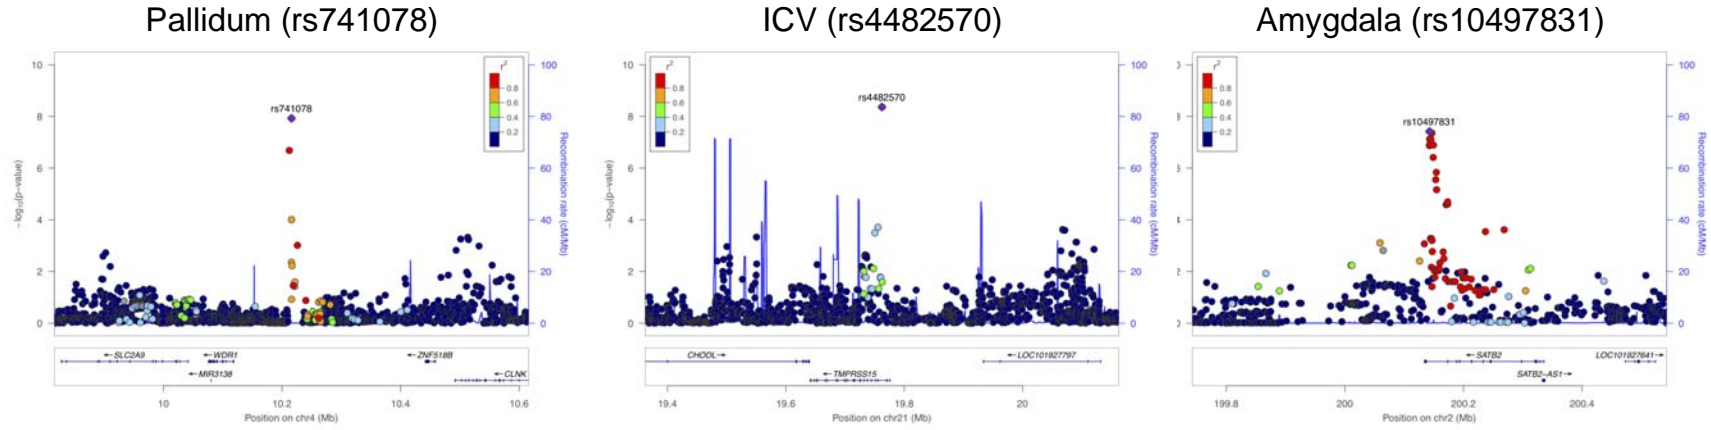

**Figure 1. Common genetic variants regulate the distribution variance of human subcortical and intracranial volumes**

Genomic inflation correction was performed for each trait/GWAS before submitting the  $p$ -values for locus zoom plot.

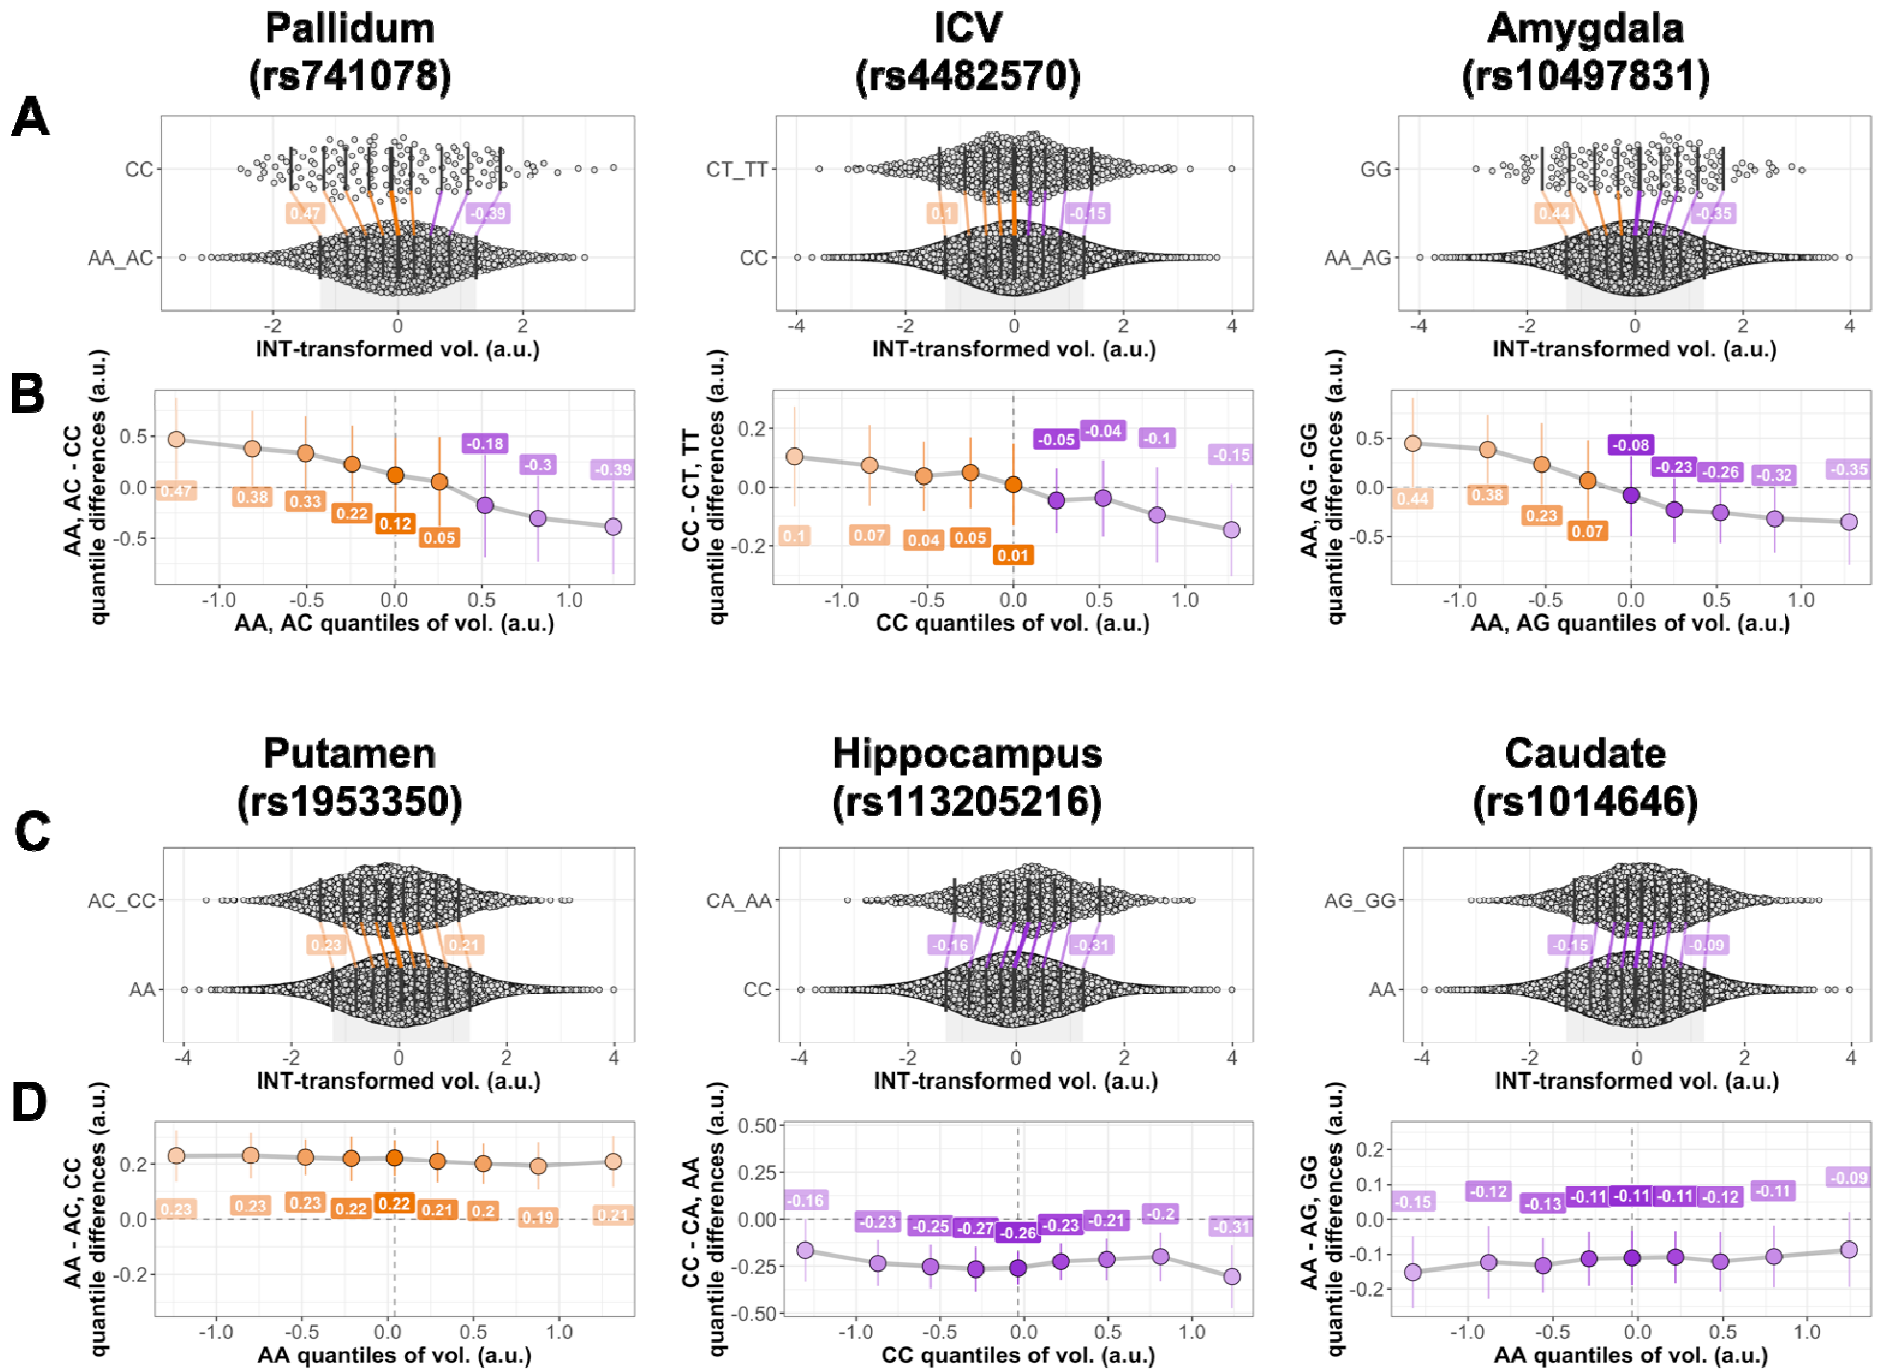

## Figure 2. Shift function plots for the top genome-wide significant associations in variance and mean model GWAS results

The results corresponding to the top 3 variance models associations are shown on top (“A”, “B”), those corresponding to the top three mean model associations (conventional GWAS) are displayed on the lower section (“C”, “D”). A: Jittered marginal distribution scatterplots for the top three variance model associations, with overlaid shift function plots using deciles. 95% confidence intervals were computed using a percentile bootstrap estimation of the standard error of the difference between quantiles on 1000 bootstrap samples. B: Linked deciles from shift functions on row “A”. C: Jittered marginal distribution scatterplots for the top three mean model associations, grouped by reference allele homozygotes and effect allele carriers. Genotypes with the minor (effect) allele are shown as a single group. 95% confidence intervals were computed as in “A”. D: Linked deciles from shift functions on row “C”. For the last three associations (“C” and “D”), variances explained by mean and variance parts of the model were 0.44% and 0.0002% (putamen, rs1953350), 0.6% and 0.009% (hippocampus, rs113205216), and 0.29% and 0.002% (caudate, rs1014646).



## References

- 1 Félix, M. A. & Barkoulas, M. Pervasive robustness in biological systems. *Nat Rev Genet* **16**, 483-496, doi:10.1038/nrg3949 (2015).
- 2 Hibar, D. P. *et al.* Common genetic variants influence human subcortical brain structures. *Nature* **520**, 224-229, doi:10.1038/nature14101 (2015).
- 3 Smeland, O. B. *et al.* Genetic Overlap Between Schizophrenia and Volumes of Hippocampus, Putamen, and Intracranial Volume Indicates Shared Molecular Genetic Mechanisms. *Schizophr Bull* **44**, 854-864, doi:10.1093/schbul/sbx148 (2018).
- 4 Wagner, A. *Robustness and evolvability in living systems*. (Princeton University Press, 2005).
- 5 Masel, J. & Trotter, M. V. Robustness and evolvability. *Trends Genet* **26**, 406-414, doi:10.1016/j.tig.2010.06.002 (2010).
- 6 Starrfelt, J. & Kokko, H. Bet-hedging--a triple trade-off between means, variances and correlations. *Biol Rev Camb Philos Soc* **87**, 742-755, doi:10.1111/j.1469-185X.2012.00225.x (2012).
- 7 Shen, X., Pettersson, M., Rönnegård, L. & Carlborg, Ö. Inheritance beyond plain heritability: variance-controlling genes in *Arabidopsis thaliana*. *PLoS Genet* **8**, e1002839, doi:10.1371/journal.pgen.1002839 (2012).
- 8 Franke, B. *et al.* Genetic influences on schizophrenia and subcortical brain volumes: large-scale proof of concept. *Nat Neurosci* **19**, 420-431, doi:10.1038/nn.4228 (2016).
- 9 Auer, P. L., Reiner, A. P. & Leal, S. M. The effect of phenotypic outliers and non-normality on rare-variant association testing. *Eur J Hum Genet* **24**, 1188-1194, doi:10.1038/ejhg.2015.270 (2016).

- 10 Rousselet, G. A., Pernet, C. R. & Wilcox, R. R. Beyond differences in means: robust graphical methods to compare two groups in neuroscience. *Eur J Neurosci* **46**, 1738-1748, doi:10.1111/ejn.13610 (2017).
- 11 Watanabe, K., Taskesen, E., van Bochoven, A. & Posthuma, D. Functional mapping and annotation of genetic associations with FUMA. *Nat Commun* **8**, 1826, doi:10.1038/s41467-017-01261-5 (2017).
- 12 Yang, J. *et al.* FTO genotype is associated with phenotypic variability of body mass index. *Nature* **490**, 267-272, doi:10.1038/nature11401 (2012).
- 13 Savage, J. E. *et al.* Genome-wide association meta-analysis in 269,867 individuals identifies new genetic and functional links to intelligence. *Nat Genet* **50**, 912-919, doi:10.1038/s41588-018-0152-6 (2018).
- 14 Döcker, D. *et al.* Further delineation of the SATB2 phenotype. *Eur J Hum Genet* **22**, 1034-1039, doi:10.1038/ejhg.2013.280 (2014).
- 15 Petit, F. *et al.* 21q21 deletion involving NCAM2: report of 3 cases with neurodevelopmental disorders. *Eur J Med Genet* **58**, 44-46, doi:10.1016/j.ejmg.2014.11.004 (2015).
- 16 Morey, R. A. *et al.* Genome-wide association study of subcortical brain volume in PTSD cases and trauma-exposed controls. *Transl Psychiatry* **7**, 1265, doi:10.1038/s41398-017-0021-6 (2017).
- 17 Ayroles, J. F. *et al.* Behavioral idiosyncrasy reveals genetic control of phenotypic variability. *Proc Natl Acad Sci U S A* **112**, 6706-6711, doi:10.1073/pnas.1503830112 (2015).

- 18 Huang, W. *et al.* Genetic basis of transcriptome diversity in *Drosophila melanogaster*. *Proc Natl Acad Sci U S A* **112**, E6010-6019, doi:10.1073/pnas.1519159112 (2015).
- 19 Fischl, B. & Dale, A. M. Measuring the thickness of the human cerebral cortex from magnetic resonance images. *Proceedings of the National Academy of Sciences of the United States of America* **97**, 11050-11055, doi:10.1073/pnas.200033797 (2000).
- 20 Shen, X. & Carlborg, O. Beware of risk for increased false positive rates in genome-wide association studies for phenotypic variability. *Front Genet* **4**, 93, doi:10.3389/fgene.2013.00093 (2013).
